# Supplementary material for: Cytotoxic effect of Montivipera bornmuelleri’s venom on cancer cell lines: in vitro and in vivo studies
Source: PeerJ. 2020 Oct 27;8:e9909. doi: 10.7717/peerj.9909 (PMC7597635; doi:10.7717/peerj.9909)
Supplement: Supplemental Information 1 [file peerj-08-9909-s001.xlsx]

## Sheet: Feuil1
Standard Concentration	log (EU/ml) of standards	average standard	Log (rfu)	average venom	Log ( rfu)	log (EU/ml) of undilluted samples	log (EU/ml) of dilluted samples
500	2.69897	211102	5.32449	1932	3.28601	-0.689551	0
50	1.69897	144980	5.16131	153	2.18469	-2.26219	0
5	0.69897	37152.5	4.56999	72	1.85733	-2.72964	0
0.5	-0.30103	4617	3.66436	-13
0.05	-1.30103	373	2.57171	-5.5
Standard Concentration	rfu	rfu	average
500	223809	198396	211102
50	162179	127782	144980
5	40056	34249	37152.5
0.5	5678	3556	4617
0.05	448	298	373
dilution mg/ml	venom	venom	average
1000	1604	2260	1932
100	141	165	153
10	-23	167	72
1	27	-53	-13
0.1	-56	45	-5.5
	a= 0,7003	b= 3,7689
	0.7003	3.7689
															a= 0,7003	b= 3,7689
															Result : No toxin in the venom
