# Supplementary material for: Cytotoxic effect of Montivipera bornmuelleri’s venom on cancer cell lines: in vitro and in vivo studies
Source: PeerJ. 2020 Oct 27;8:e9909. doi: 10.7717/peerj.9909 (PMC7597635; doi:10.7717/peerj.9909)
Supplement: Supplemental Information 2 [file peerj-08-9909-s002.xlsx]

## Sheet: Sheet1
	Flow cytometry Data																Xcelligence
	Viable Cells/Day																B16
	Concentration of Viable Cells/mL																Well ID	Concentration (g/ml)	Cell Index	Average	SD	conc ug/ml	conc (log)
																	B1	2.5e-07	2.1927	2.48185	0.40892	0.25	-0.60206
	B16	D0	D0 Average	SD D0	D1	D1 Average	SD D1	D2	D2 Average	SD D2							B2	2.5e-07	2.771
	0 ug / ml	2236	1511	1025.3	4593	3188	1986.97	14020	14236.5	306.177							C1	7.5e-07	2.123	1.7931	0.466549	0.75	-0.124939
		786			1783			14453									C2	7.5e-07	1.4632
	0.25 ug / ml	2236	1511	1025.3	80	2265	3090.06	9521	10787.5	1791.1							D1	2.3e-06	0.6192	0.60995	0.0130815	2.3	0.361728
		786			4450			12054									D2	2.3e-06	0.6007
	0.75 ug / ml	2236	1511	1025.3	1748	1729	26.8701	15354	13412	2746.4							E1	6.6e-06	-0.0397	-0.0413	0.00226274	6.6	0.819544
		786			1710			11470									E2	6.6e-06	-0.0429
	2.25 ug / ml	2236	1511	1025.3	1445	1226.5	309.006	8683	6175.5	3546.14							F1	2e-05	-0.1072	-0.10755	0.000494975	20	1.30103
		786			1008			3668									F2	2e-05	-0.1079
	6.6 ug / ml	2236	1511	1025.3	803	551.5	355.675	2355	1218.5	1607.25							G1	6e-05	-0.092	-0.1047	0.0179605	60	1.77815
		786			300			82									G2	6e-05	-0.1174
	20 ug / ml	2236	1511	1025.3	383	198	261.63	89	44.5	62.9325
		786			13			0									B16-OVA
																	Well ID	Concentration (g/ml)	Cell Index	Average	SD	conc ug/ml	conc (log)
	B16-OVA	D0	D0 Average	SD D0	D1	D1 Average	SD D1	D2	D2 Average	SD D2							B3	2.5e-07	2.0625	1.92355	0.196505	0.25	-0.60206
	0 ug / ml	1754	1358.5	559.321	3133	3275.5	201.525	10219	10280.5	86.9741							B4	2.5e-07	1.7846
		963			3418			10342									C3	7.5e-07	1.2648	1.0765	0.266296	0.75	-0.124939
	0.25 ug / ml	1754	1358.5	559.321	3298	2703	841.457	5234	5533	422.85							C4	7.5e-07	0.8882
		963			2108			5832									D3	2.3e-06	0.1552	0.12175	0.0473054	2.3	0.361728
	0.75 ug / ml	1754	1358.5	559.321	1954	2163.5	296.278	4326	4695	521.845							D4	2.3e-06	0.0883
		963			2373			5064									E3	6.6e-06	-0.1097	-0.1086	0.00155563	6.6	0.819544
	2.25 ug / ml	1754	1358.5	559.321	1872	1633	337.997	9364	7361	2832.67							E4	6.6e-06	-0.1075
		963			1394			5358									F3	2e-05	-0.1351	-0.1452	0.0142836	20	1.30103
	6.6 ug / ml	1754	1358.5	559.321	936	565	524.673	634	357.5	391.03							F4	2e-05	-0.1553
		963			194			81									G3	6e-05	-0.1586	-0.1592	0.000848528	60	1.77815
	20 ug / ml	1754	1358.5	559.321	741	380	510.531	60	32.5	38.8909							G4	6e-05	-0.1598
		963			19			5
																	MCA-Mock
	MCA-Mock	D0	D0	D0 Average	D0 SD	D1	D1	D1 Average	D1 SD	D2	D2	D2 Average	D2 SD				Well ID	Concentration (g/ml)	Cell Index	Average	SD	conc ug/ml	conc (log)
	0 ug/ml	1024	1059	1042	24.7487	2358	1059	1708.5	918.532	2536	3363	2949.5	584.777				B1	6e-05	-0.0837	-0.09245	0.0123744	60	1.77815
	0.25 ug/ml	1024	1059	1042	24.7487	583	604	593.5	14.8492	1950	814	1382	803.273				B2	6e-05	-0.1012
	0.75 ug/ml	1024	1059	1042	24.7487	398	348	373	35.3553	1811	612	1211.5	847.821				C1	2e-05	-0.0975	-0.1013	0.00537401	20	1.30103
	2.25 ug/ml	1024	1059	1042	24.7487	109	45	77	45.2548	11	8	9.5	2.12132				C2	2e-05	-0.1051
	6.6 ug/ml	1024	1059	1042	24.7487	211	53	132	111.723	5	5	5	0				D1	6.6e-06	0.0993	0.0887	0.0149907	6.6	0.819544
	20 ug/ml	1024	1059	1042	24.7487	178	82	130	67.8823	10	13	11.5	2.12132				D2	6.6e-06	0.0781
																	E1	2.2e-06	1.4312	1.4046	0.0376181	2.2	0.342423
	MCA-OVA	D0	D0	D0 Average	D0 SD	D1	D1	D1 Average	D1 SD	D2	D2	D2 Average	D2 SD				E2	2.2e-06	1.378
	0 ug/ml	812	852	832	28.2843	1094	1113	1103.5	13.435	4913	4931	4922	12.7279				F1	7.5e-07	2.6615	2.76025	0.139654	0.75	-0.124939
	0.25 ug/ml	812	852	832	28.2843	484	890	687	287.085	4725	3757	4241	684.479				F2	7.5e-07	2.859
	0.75 ug/ml	812	852	832	28.2843	649	692	670.5	30.4056	4055	4137	4096	57.9828				G1	2.5e-07	3.579	3.6459	0.0946109	0.25	-0.60206
	2.25 ug/ml	812	852	832	28.2843	18	28	23	7.07107	127	180	153.5	37.4767				G2	2.5e-07	3.7128
	6.6 ug/ml	812	852	832	28.2843	9	19	14	7.07107	76	84	80	5.65685
	20 ug/ml	812	852	832	28.2843	15	14	14.5	0.707107	57	30	43.5	19.0919				MCA-OVA
																	Well ID	Concentration (g/ml)	Cell Index	Average	SD	conc ug/ml	conc (log)
																	B3	6e-05	-0.1008	-0.09915	0.00233345	60	1.77815
																	B4	6e-05	-0.0975
																	C3	2e-05	-0.1022	-0.0899	0.0173948	20	1.30103
																	C4	2e-05	-0.0776
																	D3	6.6e-06	0.1864	0.1845	0.00268701	6.6	0.819544
																	D4	6.6e-06	0.1826
																	E3	2.2e-06	1.1593	1.13585	0.0331633	2.2	0.342423
																	E4	2.2e-06	1.1124
																	F3	7.5e-07	2.5265	2.48815	0.0542351	0.75	-0.124939
																	F4	7.5e-07	2.4498
																	G3	2.5e-07	2.9436	3.06655	0.173878	0.25	-0.60206
																	G4	2.5e-07	3.1895
