# Supplementary material for: Cytotoxic effect of Montivipera bornmuelleri’s venom on cancer cell lines: in vitro and in vivo studies
Source: PeerJ. 2020 Oct 27;8:e9909. doi: 10.7717/peerj.9909 (PMC7597635; doi:10.7717/peerj.9909)
Supplement: Supplemental Information 3 [file peerj-08-9909-s003.xlsx]

## Sheet: Sheet1
						quantity injected (µg)
						Group 1	Group 2	Group 3	Group 4			Group 1	Weight (g)				Condition: redness vs no sign
				weight (g)	Volume injected	100µg/kg	30µg/kg	10µg/kg	3µg/kg			100 ug/kg
				15	75	1.5	0.45	0.15	0.045			V injected uL	before injection	D1	D2	D3	before injection	D1	D2	D3
				16	80	1.6	0.48	0.16	0.048			150	30	29.6	29.9		NS	R	R	R
				17	85	1.7	0.51	0.17	0.051			145	29	29.6	29.5		NS	R	R	R
				18	90	1.8	0.54	0.18	0.054			150	30	29.6	29.4		NS	R	R	R
				19	95	1.9	0.57	0.19	0.057			130	26	26	25.7		NS	R	R	R
				20	100	2	0.6	0.2	0.06
				21	105	2.1	0.63	0.21	0.063			Group 2	Weight (g)				Condition: redness vs no sign
				22	110	2.2	0.66	0.22	0.066			30 ug/kg
				23	115	2.3	0.69	0.23	0.069			V injected uL	before injection	D1	D2	D3	before injection	D1	D2	D3
				24	120	2.4	0.72	0.24	0.072			120	24	23.9	24.7		NS	NS	NS	NS
				25	125	2.5	0.75	0.25	0.075			135	27	27.5	27.8		NS	NS	NS	NS
				26	130	2.6	0.78	0.26	0.078			150	30	30	29.8		NS	NS	NS	NS
				27	135	2.7	0.81	0.27	0.081
				28	140	2.8	0.84	0.28	0.084
				29	145	2.9	0.87	0.29	0.087			Group 3	Weight (g)				Condition: redness vs no sign
				30	150	3	0.9	0.3	0.09			10 ug/kg
												V injected uL	before injection	D1	D2	D3	before injection	D1	D2	D3
												140	28	28	28.9		NS	NS	NS	NS
												140	28	27	27.6		NS	NS	NS	NS
												140	28	27.5	28.2		NS	NS	NS	NS
												150	30	29.1	30.3		NS	NS	NS	NS
												Group 4	Weight (g)				Condition: redness vs no sign
												3 ug/kg
												V injected uL	before injection	D1	D2	D3	before injection	D1	D2	D3
												145	30	29	30.1		NS	NS	NS	NS
												145	29	28.8	29.3		NS	NS	NS	NS
												135	30	28.2	28.1		NS	NS	NS	NS
												145	26	29.7	30.3		NS	NS	NS	NS
