# Supplementary material for: Cytotoxic effect of Montivipera bornmuelleri’s venom on cancer cell lines: in vitro and in vivo studies
Source: PeerJ. 2020 Oct 27;8:e9909. doi: 10.7717/peerj.9909 (PMC7597635; doi:10.7717/peerj.9909)
Supplement: Supplemental Information 4 [file peerj-08-9909-s004.xlsx]

## Sheet: Feuil1
		D7		D11		D14		D18		D21		D25		D28
		Right	Left	Right	Left	Right	Left	Right	Left	Right	Left	Right	Left	Right	Left
	Venom	57.6888	17.698	364.751	425.593	408.189	833.963	1188.38	2199.15
	Venom	67.23	59.5643	177.361	242.138	313.223	514.437	632.043	959.446	996.442	1598.05	1796.81	2590.19	3190.08	2504.2
	Venom	52.8157	36.6549	309.614	476.671	358.745	808.282	993.065	1931.42	2802.05	4463.3
	Venom	16.4331	7.09171	0.0625	785.457	202.734	1934.12	599.517	4742.85
	Venom	24.7357	18.9924	130.734	433.664	135.793	207.89	411.265	482.77	712.915	1310.15	1429.32	2477.63	1903.26	1397.43
	Venom	46.569	65.9411	713.349	126.925	471.915	188.672	2136.09	572.877
	Venom	43.159	111.979	392.157	338.774	585.666	275.723	1038.78	1426.32	2173.09	2103.74
	Venom	108.296	47.2389	544.942	388.128	451.049	381.831	1057.14	1179.07	1823.03	1911.79	3443.58	5081.38
	Venom	44.0921	8.351	332.368	40.2912	532.381	118.971	1327.5	702.56	2045.46	1408.97
	Venom	35.181	55.4345	237.437	157.365	494.212	240.451	652.241	479.969	963.528	966.119	1800.05	1814.53
	Venom	23.5037	7.15899	388.359	24.98	149.486	51.9087	563.933	184.709	771.981	282.119	1680.06	612.291
	Venom	17.8072	26.3467	446.234	317.488	446.748	562.912	1392.19	1808.39	1630	2244.64
		44.7926	38.5376	336.447	313.123	379.179	509.93	999.344	1389.13	1546.5	1809.88	2029.96	2515.2	2546.67	1950.81
		25.6789	31.3356	189.616	214.214	149.669	515.76	481.053	1237.29	727.89	1163.39	804.477	1635.87	909.922	782.601
		7.41285	9.04581	54.7376	61.8381	43.2057	148.887	138.868	357.176	242.63	387.795	359.773	731.585	643.412	553.382
	CTL pos	34.5234	32.5411	537.845	53.8429	304.155	20.3032	522.019	37.271	581.042	47.6824	334.519	102.698	204.936	183.899
	CTL pos	10.1223	75	240.02	255.78	448.826	280.822	475.996	476.321	257.657	581.754	265.426	1102.4	363.653	1872.4
	CTL pos	2.75614	10.4088	87.7808	44.8246	302.648	54.6391	388.637	78.2919	87.9126	100.778	77.0974	269.071	35.9941	477.274
	CTL pos	70.275	44	135.46	37.2265	150.079	77.0358	149.514	215.66	110.609	301.176
	CTL pos	55.028	20.5568	146.282	36.2183	303.827	17.1253	223.32	16.1649	187.802	17.325	200.195	22.0765	56.5082	52.3734
	CTL pos	14.291	14.445	221.804	91.2374	89.6472	85.5318	248.192	43.0696	178.586	18.966	81.6375	18.4234	44.2331	37.8785
	CTL pos	19.4461	46.6023	141.121	80.8979	96.8959	109.296	83.6653	139.626	50.9266	166.634	53.4898	329.188	62.1257	491.755
	CTL pos	43.0222	56.4196	95.5388	1014.92	183.966	753.033	106.646	1011.59	53.6256	1583.49		2721.97
	CTL pos	53.0318	1.89726	100.202	16.515	461.746	30.871	829.016	31.951	628.553	29.4335	379.822	50.7595	162.336	80.7537
	CTL pos	79.8713	6.32069	156.129	16.5807	264.41	31.0632	298.633	35.5233	227.583	51.9329	162.897	79.9989	74.8978	62.4452
	CTL pos	20.4045	14.8565	148.459	4.76374	280.947	16.4538	187.597	32.3614	325.041	28.4223	149.678	19.4925	244.223	37.9059
	CTL pos	123.234	32.2435	483.57	93.8372	353.034	90.1278	509.158	65.3562	358.821	101.52	252.057	323.02	119.641	440.594
		43.8338	29.6076	207.851	145.554	270.015	130.525	335.199	181.932	254.013	252.426	195.682	458.099	136.855	373.728
		34.9542	22.3587	149.074	281.733	121.895	209.04	218.444	291.742	191.548	449.999	111.417	813.746	107.07	560.034
		10.0904	6.4544	43.0338	81.3295	35.1881	60.3447	63.0592	84.2186	55.2951	129.903	35.2332	245.354	33.8586	177.098
	PBS	120.854	64.7718	476.667	249.452	781.677	369.772	2788.43	1702.24
	PBS	19.416	68.0077	103.208	223.796	84.2478	438.396	193.067	1397.67	381.318	1907.07	973.417	4110.23	4110.23
	PBS	36.1227	27.1403	136	103.567	186.399	161.193	737.662	778.312	899.799	1426.36	2118.74	2844.44	2844.44
	PBS	58.2537	12.168	515.681	373.425	801.083	535.888	2295.68	1811.67
	PBS	34.4	57.9868	125.079	244.605	128.423	262.512	250.689	1070.56	633.689	1927.17	1159.45	4040.9
	PBS	161.619	16.9013	396.382	101.242	541.847	225.585	1088.08	349.354	2148.24	481.492
	PBS	33.1054	41.1558	164.268	452.943	324.928	653.802	923.654	1305.78	1428.23	2261.98
	PBS	34.4386	51.5487	203.29	623.47	330.413	759.54	1034.99	2754.57
	PBS	17.3306	15.6107	29.6999	194.862	49.2098	363.308	107.783	889.332	307.439	1742.58	870.283	4153.62	4153.62
	PBS	44.7836	2.4	193.62	514.907	554.923	905.589	1006.41	2515.12
		56.0324	35.7691	234.39	308.227	378.315	467.558	1042.64	1457.46	966.452	1624.44	1280.47	3787.3	3702.77	#DIV/0!
		47.3484	23.9431	167.447	176.226	278.603	243.177	878.849	758.266	707.348	622.497	571.511	630.285	743.648	#DIV/0!
		14.9729	7.57147	52.9514	55.7274	88.1019	76.8993	277.917	239.785	288.774	254.133	285.756	315.142	429.345	#DIV/0!
